# Supplementary material
Source: PubMed Central journal article supplement (PMC5054348)
Supplement: 10.1074_M116.058164_mcp.M116.058164-1.pdf [file 10.1074_M116.058164_mcp.M116.058164-1.pdf]

**Tab. S1:** Differentially regulated transport proteins of *S. melonis* Fr1 and *M. extorquens* PA1 during colonization of the phyllosphere.

| Locus Tag                                     | log2FC | p-value <sup>1</sup> | Annotation                                                                       | KO term    |
|-----------------------------------------------|--------|----------------------|----------------------------------------------------------------------------------|------------|
| <b><i>Sphingomonas melonis</i> Fr1</b>        |        |                      |                                                                                  |            |
| Sphme2DRAFT_1292                              | ∞      | not in planta        | ABC-type antimicrobial peptide transport system, ATPase component                | K02003     |
| Sphme2DRAFT_2463                              | ∞      | not in planta        | TonB-dependent receptor                                                          | K02014     |
| Sphme2DRAFT_2539                              | ∞      | not in planta        | K <sup>+</sup> transporter                                                       | K03549     |
| Sphme2DRAFT_2640                              | ∞      | not in planta        | heavy metal efflux pump (cobalt-zinc-cadmium)                                    | K15726     |
| Sphme2DRAFT_3241                              | ∞      | not in planta        | TonB-dependent receptor                                                          | no KO term |
| Sphme2DRAFT_3443                              | ∞      | not in planta        | Na <sup>+</sup> /H <sup>+</sup> -dicarboxylate symporters                        | no KO term |
| Sphme2DRAFT_3924                              | ∞      | not in planta        | Multidrug resistance efflux pump                                                 | K15727     |
| Sphme2DRAFT_0085                              | ∞      | in planta only       | Type II secretory pathway, component Pull                                        | K02461     |
| Sphme2DRAFT_0092                              | ∞      | in planta only       | Type II secretory pathway, ATPase Pule/Tfp pilus assembly pathway, ATPase PilB   | K02454     |
| Sphme2DRAFT_0094                              | ∞      | in planta only       | hypothetical protein                                                             | K02452     |
| Sphme2DRAFT_0570                              | ∞      | in planta only       | Na <sup>+</sup> /H <sup>+</sup> -dicarboxylate symporters                        | no KO term |
| Sphme2DRAFT_0861                              | ∞      | in planta only       | Mg <sup>2+</sup> and Co <sup>2+</sup> transporters                               | K16074     |
| Sphme2DRAFT_1176                              | ∞      | in planta only       | Predicted flavoprotein involved in K <sup>+</sup> transport                      | no KO term |
| Sphme2DRAFT_1215                              | ∞      | in planta only       | TonB-dependent receptor                                                          | no KO term |
| Sphme2DRAFT_1218                              | ∞      | in planta only       | Outer membrane receptor proteins, mostly Fe transport                            | no KO term |
| Sphme2DRAFT_1440                              | ∞      | in planta only       | twin arginine-targeting protein translocase TatB                                 | K03117     |
| Sphme2DRAFT_1490                              | ∞      | in planta only       | ABC-type phosphate transport system, periplasmic component                       | K02040     |
| Sphme2DRAFT_1600                              | ∞      | in planta only       | export-related chaperone CsaA                                                    | K06878     |
| Sphme2DRAFT_1633                              | ∞      | in planta only       | Outer membrane receptor proteins, mostly Fe transport                            | K02014     |
| Sphme2DRAFT_1759                              | ∞      | in planta only       | drug resistance transporter, EmrB/QacA subfamily                                 | K03446     |
| Sphme2DRAFT_1905                              | ∞      | in planta only       | ABC-type multidrug transport system, ATPase component                            | K01990     |
| Sphme2DRAFT_2035                              | ∞      | in planta only       | Outer membrane receptor proteins, mostly Fe transport                            | K02014     |
| Sphme2DRAFT_2144                              | ∞      | in planta only       | cation diffusion facilitator family transporter                                  | K16264     |
| Sphme2DRAFT_2257                              | ∞      | in planta only       | autotransporter secretion outer membrane protein TamA                            | K07278     |
| Sphme2DRAFT_2293                              | ∞      | in planta only       | molybdenum ABC transporter, periplasmic molybdate-binding protein                | K02020     |
| Sphme2DRAFT_2388                              | ∞      | in planta only       | Outer membrane receptor proteins, mostly Fe transport                            | K02014     |
| Sphme2DRAFT_2399                              | ∞      | in planta only       | K <sup>+</sup> -transporting ATPase, B subunit                                   | K01547     |
| Sphme2DRAFT_2554                              | ∞      | in planta only       | Periplasmic protein involved in polysaccharide export                            | K01991     |
| Sphme2DRAFT_2984                              | ∞      | in planta only       | ABC-type antimicrobial peptide transport system, ATPase component                | K09810     |
| Sphme2DRAFT_3177                              | ∞      | in planta only       | efflux transporter, outer membrane factor (OMF) lipoprotein, NodT family         | no KO term |
| Sphme2DRAFT_3232                              | ∞      | in planta only       | Phosphotransferase system, mannose/fructose-specific component IIA               | K02793     |
| Sphme2DRAFT_3255                              | ∞      | in planta only       | Na <sup>+</sup> /H <sup>+</sup> -dicarboxylate symporters                        | no KO term |
| Sphme2DRAFT_3424                              | ∞      | in planta only       | Multidrug resistance efflux pump                                                 | K03543     |
| Sphme2DRAFT_1760                              | 1.6    | 0.000                | Multidrug resistance efflux pump                                                 | K03543     |
| Sphme2DRAFT_0248                              | 1.3    | 0.000                | RND family efflux transporter, MFP subunit                                       | K03585     |
| Sphme2DRAFT_3075                              | 1.3    | 0.006                | Long-chain fatty acid transport protein                                          | K06076     |
| Sphme2DRAFT_1931                              | -1.1   | 0.023                | putative oligopeptide transporter, OPT family                                    | no KO term |
| Sphme2DRAFT_1505                              | -1.2   | 0.000                | preprotein translocase, SecE subunit, bacterial                                  | K03073     |
| Sphme2DRAFT_3016                              | -1.3   | 0.049                | Kef-type K <sup>+</sup> transport systems, membrane components                   | K03455     |
| Sphme2DRAFT_1964                              | -1.5   | 0.030                | amino acid/polyamine/organoanion transporter                                     | K03294     |
| Sphme2DRAFT_0228                              | -1.5   | 0.000                | Amino acid transporters                                                          | K03294     |
| Sphme2DRAFT_2246                              | -1.6   | 0.001                | glucose/galactose transporter                                                    | K02429     |
| Sphme2DRAFT_1113                              | -5.0   | 0.010                | Cation/multidrug efflux pump                                                     | no KO term |
| <b><i>Methylobacterium extorquens</i> PA1</b> |        |                      |                                                                                  |            |
| Mext_0396                                     | ∞      | not in planta        | efflux transporter, RND family, MFP subunit                                      | no KO term |
| Mext_0672                                     | ∞      | not in planta        | TonB-dependent siderophore receptor                                              | K02014     |
| Mext_2137                                     | ∞      | not in planta        | major facilitator superfamily MFS_1                                              | K08177     |
| Mext_2515                                     | ∞      | not in planta        | binding-protein-dependent transport systems inner membrane component             | K13895     |
| Mext_2624                                     | ∞      | not in planta        | ABC transporter related                                                          | no KO term |
| Mext_2874                                     | ∞      | not in planta        | ABC transporter related                                                          | K11085     |
| Mext_4071                                     | ∞      | not in planta        | ABC transporter related                                                          | K13409     |
| Mext_4199                                     | ∞      | not in planta        | major facilitator superfamily MFS_1                                              | no KO term |
| Mext_4371                                     | ∞      | not in planta        | binding-protein-dependent transport systems inner membrane component             | K02050     |
| Mext_4496                                     | ∞      | not in planta        | twin-arginine translocation pathway signal                                       | K15576     |
| Mext_1172                                     | ∞      | in planta only       | aliphatic sulfonates family ABC transporter, periplasmic ligand-binding protein  | K15553     |
| Mext_1212                                     | ∞      | in planta only       | major facilitator superfamily MFS_1                                              | K08177     |
| Mext_1299                                     | ∞      | in planta only       | ammonium transporter                                                             | K03320     |
| Mext_2739                                     | ∞      | in planta only       | type I secretion system ATPase                                                   | K06148     |
| Mext_2740                                     | ∞      | in planta only       | type I secretion membrane fusion protein, HlyD family                            | K02022     |
| Mext_3265                                     | ∞      | in planta only       | putative exported protein of unknown function                                    | no KO term |
| Mext_3338                                     | ∞      | in planta only       | ABC-type nitrate/sulfonate/bicarbonate transport systems components-like protein | K02051     |
| Mext_3341                                     | ∞      | in planta only       | aliphatic sulfonates family ABC transporter, periplasmic ligand-binding protein  | K02051     |
| Mext_3347                                     | ∞      | in planta only       | putative ABC transporter, substrate-binding protein                              | K02051     |
| Mext_3405                                     | ∞      | in planta only       | aliphatic sulfonates family ABC transporter, periplasmic ligand-binding protein  | K15553     |
| Mext_3406                                     | ∞      | in planta only       | binding-protein-dependent transport systems inner membrane component             | K15554     |
| Mext_3407                                     | ∞      | in planta only       | ABC transporter related                                                          | K15555     |
| Mext_3438                                     | ∞      | in planta only       | ABC-2 type transporter                                                           | K01992     |
| Mext_3494                                     | ∞      | in planta only       | hypothetical protein                                                             | K01999     |
| Mext_4685                                     | ∞      | in planta only       | General substrate transporter                                                    | K03761     |
| Mext_2535                                     | 2.0    | 0.000                | polysaccharide export protein                                                    | K01991     |
| Mext_3409                                     | 1.9    | 0.029                | aliphatic sulfonates family ABC transporter, periplasmic ligand-binding protein  | K15553     |
| Mext_4713                                     | 1.8    | 0.000                | phosphate ABC transporter, periplasmic phosphate-binding protein                 | K02040     |
| Mext_2832                                     | 1.6    | 0.030                | efflux transporter, RND family, MFP subunit                                      | no KO term |
| Mext_4223                                     | 1.4    | 0.005                | L-lactate transport                                                              | K03303     |
| Mext_4754                                     | 1.3    | 0.002                | secretion protein HlyD family protein                                            | no KO term |
| Mext_0584                                     | 1.2    | 0.000                | sulfate ABC transporter, ATPase subunit                                          | K02045     |
| Mext_4833                                     | 1.2    | 0.000                | MscS Mechanosensitive ion channel                                                | no KO term |
| Mext_0583                                     | 1.2    | 0.024                | sulfate ABC transporter, inner membrane subunit CysW                             | K02047     |
| Mext_0380                                     | 1.0    | 0.000                | ABC transporter related                                                          | K01990     |

<sup>1</sup> Benjamini-Hochberg corrected for multiple testing
