# Supplementary material
Source: PubMed Central journal article supplement (PMC5054348)
Supplement: 10.1074_M116.058164_mcp.M116.058164-2.pdf [file 10.1074_M116.058164_mcp.M116.058164-2.pdf]

**Tab. S2:** Methanol metabolism of *M. extorquens* PA1 during colonization of the *A. thaliana* phyllosphere.

| Locus-Tag                       | Annotation (Gene name)                                                 | log2 FC | p-value <sup>1</sup> | Nr. |
|---------------------------------|------------------------------------------------------------------------|---------|----------------------|-----|
| <b>Methanol oxidation</b>       |                                                                        |         |                      |     |
| Mext_4150                       | methanol/ethanol family PQQ-dependent dehydrogenase (mxaF)             | -0.2    | <0.01                | 1   |
| Mext_4147                       | methanol dehydrogenase subunit beta                                    | -0.1    | 0.726                | 2   |
| Mext_1809                       | methanol/ethanol family PQQ-dependent dehydrogenase (xoxF)             | 2.5     | <0.01                | 3   |
| Mext_1339                       | methanol/ethanol family PQQ-dependent dehydrogenase                    | 3.2     | <0.01                | 4   |
| Mext_0099                       | methanol/ethanol family PQQ-dependent dehydrogenase                    | n.d.    |                      | 5   |
| <b>Formaldehyde oxidation</b>   |                                                                        |         |                      |     |
| Mext_1809                       | methanol/ethanol family PQQ-dependent dehydrogenase                    | 2.5     | <0.01                | 6   |
| <b>H4MPT dependent</b>          |                                                                        |         |                      |     |
| Mext_1834                       | formaldehyde-activating enzyme                                         | -1.7    | <0.01                | 7   |
| Mext_1450                       | formaldehyde-activating enzyme                                         | -0.8    | <0.01                | 8   |
| Mext_1829                       | methylene-tetrahydromethanopterin dehydrogenase                        | -0.7    | <0.01                | 9   |
| Mext_1831                       | N(5),N(10)-methenyltetrahydromethanopterin cyclohydrolase              | -0.8    | <0.01                | 10  |
| Mext_1824                       | formylmethanofuran dehydrogenase subunit C                             | -0.4    | <0.01                | 11  |
| Mext_1825                       | formylmethanofuran--tetrahydromethanopterin formyltransferase          | -0.7    | <0.01                | 12  |
| Mext_1826                       | formylmethanofuran dehydrogenase subunit A                             | -0.5    | <0.01                | 13  |
| Mext_1827                       | tungsten-containing formylmethanofuran dehydrogenase subunit B         | -0.5    | <0.01                | 14  |
| <b>H4FT dependent</b>           |                                                                        |         |                      |     |
| Mext_1797                       | methylenetetrahydrofolate dehydrogenase                                | -2.4    | <0.01                | 15  |
| Mext_1798                       | formiminotransferase-cyclodeaminase                                    | -2.6    | <0.01                | 16  |
| Mext_0414                       | formate--tetrahydrofolate ligase                                       | -2.1    | <0.01                | 17  |
| <b>Formate oxidation</b>        |                                                                        |         |                      |     |
| Mext_4582                       | formate dehydrogenase subunit alpha (fdh1A)                            | 2.0     | <0.01                | 18  |
| Mext_4581                       | respiratory-chain NADH dehydrogenase domain-containing protein (fdh1B) | 1.8     | <0.01                | 19  |
| Mext_4404                       | NADH dehydrogenase (ubiquinone) 24 kDa subunit (fdh2C)                 | -0.5    | 0.026                | 20  |
| Mext_4405                       | NADH dehydrogenase (quinone) (fdh2B)                                   | -0.3    | <0.01                | 21  |
| Mext_4406                       | formate dehydrogenase subunit alpha (fdh2A)                            | -0.3    | <0.01                | 22  |
| Mext_4407                       | hypothetical protein (fdh2D)                                           | -0.9    | 0.011                | 23  |
| Mext_0389                       | molybdopterin oxidoreductase (fdh3A)                                   | 1.5     | <0.01                | 24  |
| Mext_0390                       | 4Fe-4S ferredoxin (fdh3B)                                              | 1.0     | <0.01                | 25  |
| Mext_0391                       | formate dehydrogenase subunit gamma (fdh3C)                            | 2.2     | <0.01                | 26  |
| Mext_2105                       | oxidoreductase alpha (molybdopterin) subunit (fdh4A)                   | 0.0     | 0.95                 | 27  |
| Mext_2104                       | Hypothetical protein (fdh4B)                                           | n.d.    |                      | 28  |
| <b>Serine cycle</b>             |                                                                        |         |                      |     |
| Mext_3171                       | serine hydroxymethyltransferase                                        | -0.7    | <0.01                | 29  |
| Mext_1795                       | serine--glyoxylate transaminase                                        | -2.3    | <0.01                | 30  |
| Mext_1796                       | D-isomer specific 2-hydroxyacid dehydrogenase (hpr)                    | -1.2    | <0.01                | 31  |
| Mext_2747                       | hydroxypyruvate reductase                                              | -1.8    | <0.01                | 32  |
| Mext_0771                       | hydroxypyruvate reductase                                              | n.d.    |                      | 33  |
| Mext_2784                       | phosphopyruvate hydratase                                              | -0.3    | <0.01                | 34  |
| Mext_1801                       | phosphoenolpyruvate carboxylase                                        | -1.5    | <0.01                | 35  |
| Mext_4533                       | phosphoenolpyruvate carboxylase                                        | -0.3    | 0.076                | 36  |
| Mext_1643                       | malate dehydrogenase                                                   | -0.6    | <0.01                | 37  |
| Mext_2939                       | inosine-5'-monophosphate dehydrogenase                                 | 0.5     | <0.01                | 38  |
| Mext_1509                       | malate:quinone oxidoreductase                                          | 0.7     | 0.146                | 39  |
| Mext_1799                       | malate--CoA ligase subunit beta (mtkA)                                 | -2.7    | <0.01                | 40  |
| Mext_1800                       | succinyl-CoA synthetase subunit alpha (mtkB)                           | -2.4    | <0.01                | 41  |
| Mext_1802                       | citrate (pro-3S)-lyase (mclA)                                          | -2.0    | <0.01                | 42  |
| <b>Ethylmalonyl-CoA pathway</b> |                                                                        |         |                      |     |
| Mext_3469                       | acetyl-CoA acetyltransferase (phaA)                                    | -0.5    | <0.01                | 43  |
| Mext_3470                       | acetoacetyl-CoA reductase (phaB)                                       | -0.9    | <0.01                | 44  |
| Mext_3610                       | enoyl-CoA hydratase/isomerase                                          | -0.6    | 0.383                | 45  |
| Mext_4237                       | enoyl-CoA hydratase/isomerase                                          | -0.8    | <0.01                | 46  |
| Mext_4649                       | enoyl-CoA hydratase                                                    | -0.6    | 0.016                | 47  |
| Mext_3444                       | dehydratase (croR)                                                     | -1.3    | <0.01                | 48  |
| Mext_0288                       | crotonyl-CoA reductase (ccr)                                           | -1.0    | <0.01                | 49  |
| Mext_1069                       | methylmalonyl-CoA epimerase (epi)                                      | -0.5    | 0.025                | 50  |
| Mext_0290                       | methylmalonyl-CoA mutase large subunit (ecm)                           | -0.8    | <0.01                | 51  |
| Mext_2228                       | acyl-CoA dehydrogenase domain-containing protein (msd)                 | -0.6    | <0.01                | 52  |
| Mext_3781                       | dehydratase (mcd)                                                      | -2.0    | <0.01                | 53  |
| Mext_1802                       | citrate (pro-3S)-lyase (mcl)                                           | -2.0    | <0.01                | 54  |
| Mext_0282                       | carboxyl transferase (pccB)                                            | -1.3    | <0.01                | 55  |
| Mext_2996                       | carbamoyl-phosphate synthase L chain ATP-binding (pccA)                | -1.0    | <0.01                | 56  |
| Mext_4794                       | methylmalonyl-CoA mutase (mcmA)                                        | -1.1    | <0.01                | 57  |
| Mext_2388                       | methylmalonyl-CoA mutase (mcmB)                                        | -1.5    | <0.01                | 58  |

<sup>1</sup> Benjamini-Hochberg corrected for multiple testing
