# Supplementary material
Source: PubMed Central journal article supplement (PMC5054348)
Supplement: 10.1074_M116.058164_mcp.M116.058164-3.pdf [file 10.1074_M116.058164_mcp.M116.058164-3.pdf]

**Tab. S3:** Oxalate metabolism of *M. extorquens* PA1 during colonization of the *A. thaliana* phyllosphere.

| <b>Locus-Tag</b>                                        | <b>Annotation (Gene name)</b>                | <b>log2 FC</b> | <b>p-value<sup>1</sup></b> |
|---------------------------------------------------------|----------------------------------------------|----------------|----------------------------|
| <b>Oxalate utilization</b>                              |                                              |                |                            |
| Mext_1207                                               | formyl-coenzyme A transferase                | 1.4            | <0.01                      |
| Mext_1209                                               | putative oxalyl-CoA decarboxylase            | 2.9            | 0.013                      |
| Mext_1212                                               | major facilitator transporter                | ∞              | only in planta             |
| Mext_2958                                               | oxidoreductase alpha (molybdopterin) subunit | 1.5            | <0.01                      |
| <b>Oxalate assimilation in <i>M. extorquens</i> AM1</b> |                                              |                |                            |
| Mext_2139                                               | 2-dehydropantoate 2-reductase (panE2)        | -0.8           | <0.01                      |
| Mext_2140                                               | AMP-dependent synthetase and ligase (oxs)    | -1.2           | <0.01                      |
| <b>Redox balance</b>                                    |                                              |                |                            |
| Mext_2759                                               | NAD(P)(+) transhydrogenase (pntAA)           | 2.1            | <0.01                      |
| Mext_2760                                               | NAD(P) transhydrogenase subunit PntAB        | 2.4            | <0.01                      |
| Mext_2761                                               | NAD(P)(+) transhydrogenase (pntB)            | 1.6            | <0.01                      |
| <b>Periplasmic formate oxidation</b>                    |                                              |                |                            |
| Mext_0389                                               | molybdopterin oxidoreductase (fdh3A)         | 1.5            | <0.01                      |
| Mext_0390                                               | 4Fe-4S ferredoxin (fdh3B)                    | 1.0            | <0.01                      |
| Mext_0391                                               | formate dehydrogenase subunit gamma (fdh3C)  | 2.2            | <0.01                      |

<sup>1</sup> Benjamini-Hochberg corrected for multiple testing
