# Supplementary material
Source: PubMed Central journal article supplement (PMC5054348)
Supplement: 10.1074_M116.058164_mcp.M116.058164-4.pdf [file 10.1074_M116.058164_mcp.M116.058164-4.pdf]

**Tab. S4:** Predicted operon structures containing alkanesulfonate monooxygenase genes

| Locus-Tag | Annotation (Gene name)                                                            | log2 FC | p-value <sup>1</sup> |
|-----------|-----------------------------------------------------------------------------------|---------|----------------------|
| Mext_1170 | acyl-CoA dehydrogenase domain-containing protein                                  | ∞       | in planta only       |
| Mext_1171 | alkanesulfonate monooxygenase                                                     | ∞       | in planta only       |
| Mext_1172 | aliphatic sulfonate ABC transporter substrate-binding protein                     | ∞       | in planta only       |
| Mext_1173 | cupin                                                                             | ∞       | in planta only       |
| Mext_3338 | nitrate/sulfonate/bicarbonate ABC transporter periplasmic components-like protein | ∞       | in planta only       |
| Mext_3339 | molybdopterin binding oxidoreductase                                              | ∞       | in planta only       |
| Mext_3341 | aliphatic sulfonate ABC transporter substrate-binding protein                     | ∞       | in planta only       |
| Mext_3342 | alkanesulfonate monooxygenase                                                     | ∞       | in planta only       |
| Mext_3343 | xanthine permease                                                                 | ∞       | in planta only       |
| Mext_3404 | NADPH-dependent FMN reductase                                                     | ∞       | in planta only       |
| Mext_3405 | aliphatic sulfonate ABC transporter substrate-binding protein                     | ∞       | in planta only       |
| Mext_3406 | binding-protein-dependent transport system inner membrane protein                 | ∞       | in planta only       |
| Mext_3407 | ABC transporter-like protein                                                      | ∞       | in planta only       |
| Mext_3408 | alkanesulfonate monooxygenase                                                     | 2.3     | <0.01                |
| Mext_3409 | aliphatic sulfonate ABC transporter substrate-binding protein                     | 1.9     | 0.029                |
| Mext_3663 | alkanesulfonate monooxygenase                                                     | ∞       | in planta only       |

<sup>1</sup> Benjamini-Hochberg corrected for multiple testing
