# Supplementary material
Source: PubMed Central journal article supplement (PMC5054348)
Supplement: 10.1074_M116.058164_mcp.M116.058164-5.pdf [file 10.1074_M116.058164_mcp.M116.058164-5.pdf]

**Tab. S5: KEGG orthology terms and functional annotation of co-regulated proteins between *M. extorquens* PA1 and *S. melonis* Fr1.**

| KO term                               | Genes PA1  | Genes Fr1                                            | exemplary annotation                                             | functional category                                                        |
|---------------------------------------|------------|------------------------------------------------------|------------------------------------------------------------------|----------------------------------------------------------------------------|
| <b>Shared up regulated KO terms</b>   |            |                                                      |                                                                  |                                                                            |
| K01990                                | Mext_0380  | Sphme2DRAFT_1905                                     | ABC transporter related                                          |                                                                            |
| K01610                                | Mext_1639  | Sphme2DRAFT_3227                                     | Phosphoenolpyruvate carboxykinase (ATP)                          | Carbohydrate metabolism, Energy metabolism                                 |
| K00299                                | Mext_3404  | Sphme2DRAFT_0605                                     | NADPH-dependent FMN reductase                                    | Energy metabolism, Metabolism of cofactors and vitamins                    |
| K01620                                | Mext_4651  | Sphme2DRAFT_1332                                     | aromatic amino acid beta-eliminating lyase/threonine aldolase    | Amino acid metabolism                                                      |
| K02334                                | Mext_2306  | Sphme2DRAFT_0732, Sphme2DRAFT_3262                   | Uracil-DNA glycosylase superfamily                               |                                                                            |
| K00058                                | Mext_0660  | Sphme2DRAFT_1089                                     | D-3-phosphoglycerate dehydrogenase                               | Amino acid metabolism, Energy metabolism                                   |
| K07305                                | Mext_1761  | Sphme2DRAFT_1326                                     | methionine-R-sulfoxide reductase                                 |                                                                            |
| K01724                                | Mext_1805  | Sphme2DRAFT_0771                                     | transcriptional coactivator/pterin dehydratase                   |                                                                            |
|                                       | Mext_1378, |                                                      |                                                                  |                                                                            |
| K09796                                | Mext_1379  | Sphme2DRAFT_0994                                     | protein of unknown function DUF461                               |                                                                            |
| K01991                                | Mext_2535  | Sphme2DRAFT_2554                                     | polysaccharide export protein                                    |                                                                            |
| K02040                                | Mext_4713  | Sphme2DRAFT_1490                                     | phosphate ABC transporter, periplasmic phosphate-binding protein | Membrane transport, Signal transduction, Infectious diseases               |
| K00382                                | Mext_4080  | Sphme2DRAFT_3098                                     | FAD-dependent pyridine nucleotide-disulphide oxidoreductase      | Amino acid metabolism, Carbohydrate metabolism                             |
| <b>Shared down regulated KO terms</b> |            |                                                      |                                                                  |                                                                            |
| K02014                                | Mext_0672  | Sphme2DRAFT_0191, Sphme2DRAFT_1738, Sphme2DRAFT_2463 | TonB-dependent siderophore receptor                              |                                                                            |
| K06167                                | Mext_4185  | Sphme2DRAFT_3194                                     | beta-lactamase-like protein                                      | Metabolism of other amino acids                                            |
| K01447                                | Mext_0941  | Sphme2DRAFT_2582                                     | N-acetylmuramoyl-L-alanine amidase family 2                      |                                                                            |
| K01589                                | Mext_1963  | Sphme2DRAFT_0648                                     | phosphoribosylaminoimidazole carboxylase, ATPase subunit         | Nucleotide metabolism                                                      |
| K00940                                | Mext_2012  | Sphme2DRAFT_3212                                     | Nucleoside-diphosphate kinase                                    | Nucleotide metabolism                                                      |
| K00799                                | Mext_1924  | Sphme2DRAFT_1599                                     | Glutathione S-transferase domain                                 | Metabolism of other amino acids, Xenobiotics biodegradation and metabolism |
| K01462                                | Mext_3949  | Sphme2DRAFT_3344                                     | formylmethionine deformylase                                     |                                                                            |
