# Supplementary material
Source: PubMed Central journal article supplement (PMC5054348)

**Fig. S1:** Venn diagrams showing the overlap of proteins contained in the SWATH assay libraries obtained by shotgun proteomics (green: OGE-fractionated samples derived from liquid bacterial cultures in three different growth stages; red: unfractionated samples derived from bacteria grown on plant leaves) as well as of proteins actually detected by SWATH MS in the unfractionated plate- and plant-derived bacterial samples (yellow: plate; blue: plant). OGE, off-gel electrophoresis.

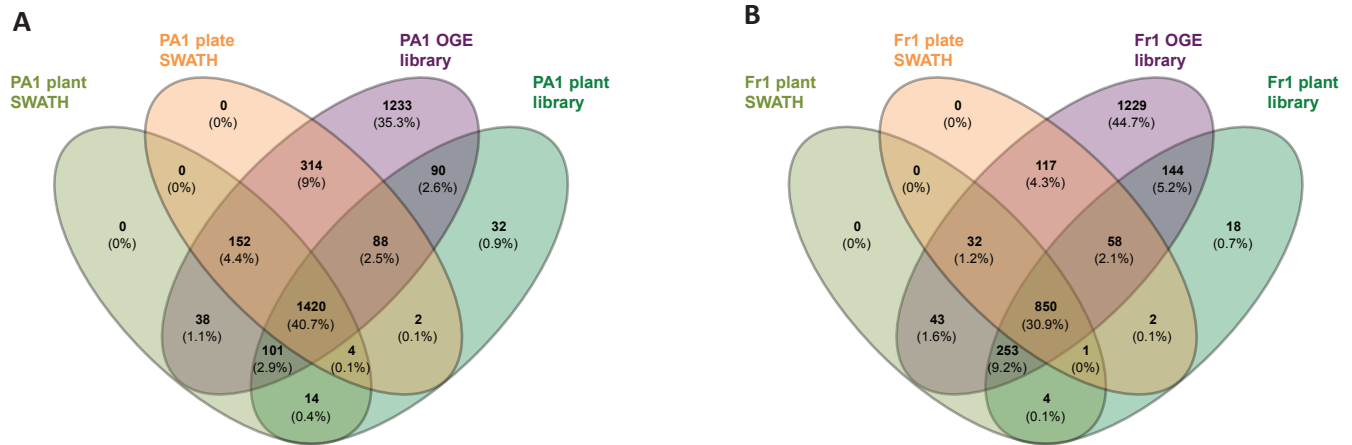

Supplement: 10.1074_M116.058164_mcp.M116.058164-6.pdf [file 10.1074_M116.058164_mcp.M116.058164-6.pdf]
