# Supplementary material
Source: PubMed Central journal article supplement (PMC5054348)
Supplement: 10.1074_M116.058164_mcp.M116.058164-7.pdf [file 10.1074_M116.058164_mcp.M116.058164-7.pdf]

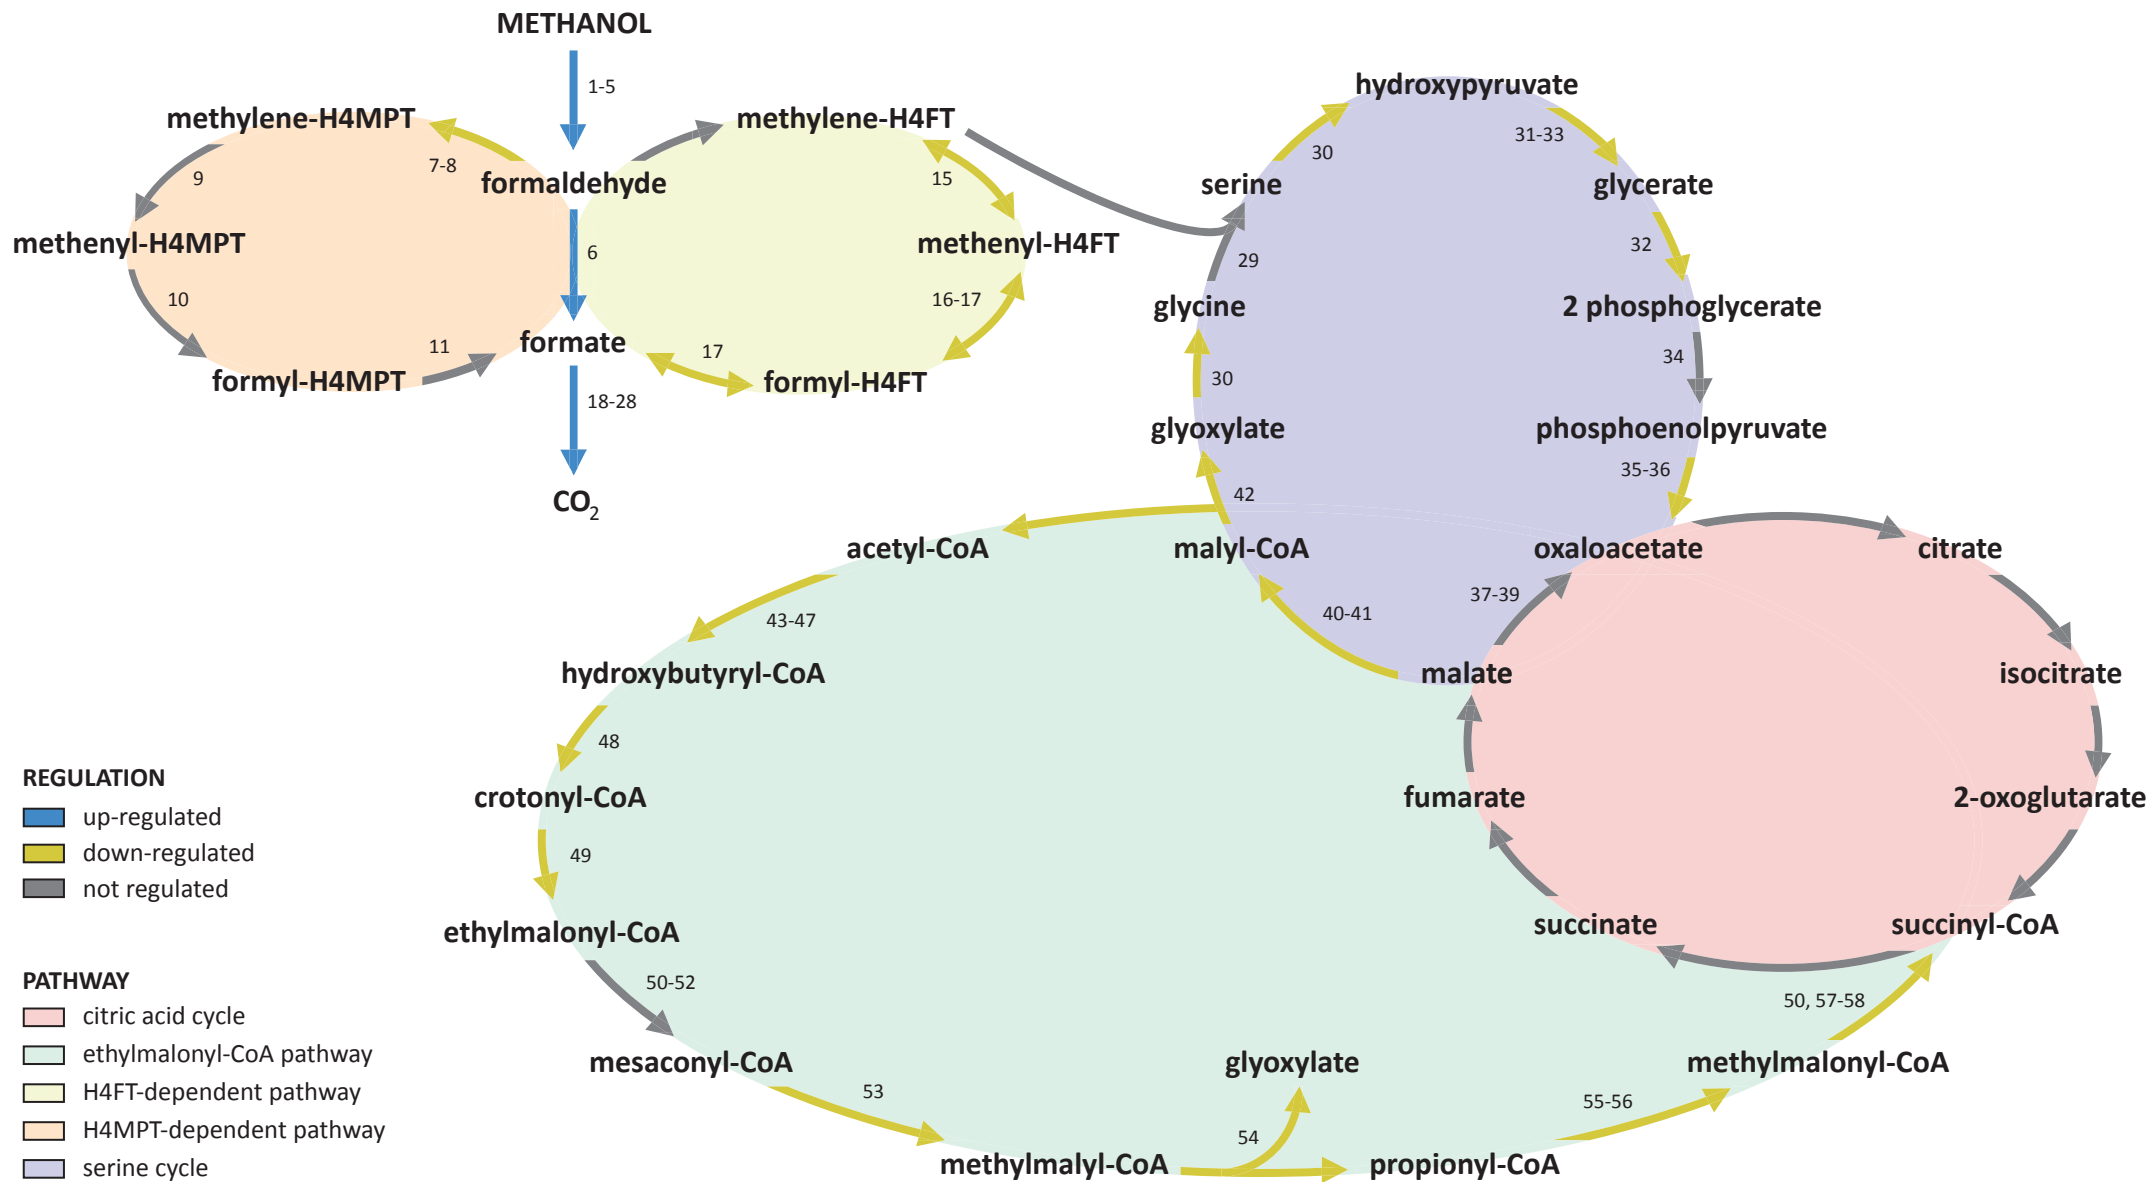

**Fig. S2: Central carbon metabolism of *M. extorquens* PA1 during plant colonization as compared to colonization of minimal media agar plates.** Pathways and regulation of respective proteins is indicated. Proteins are numbered and listed in Tab. S1 for more details.
