# Supplementary material
Source: PubMed Central journal article supplement (PMC5054348)
Supplement: 10.1074_M116.058164_mcp.M116.058164-8.pdf [file 10.1074_M116.058164_mcp.M116.058164-8.pdf]

light microscopy

fluorescence

overlay

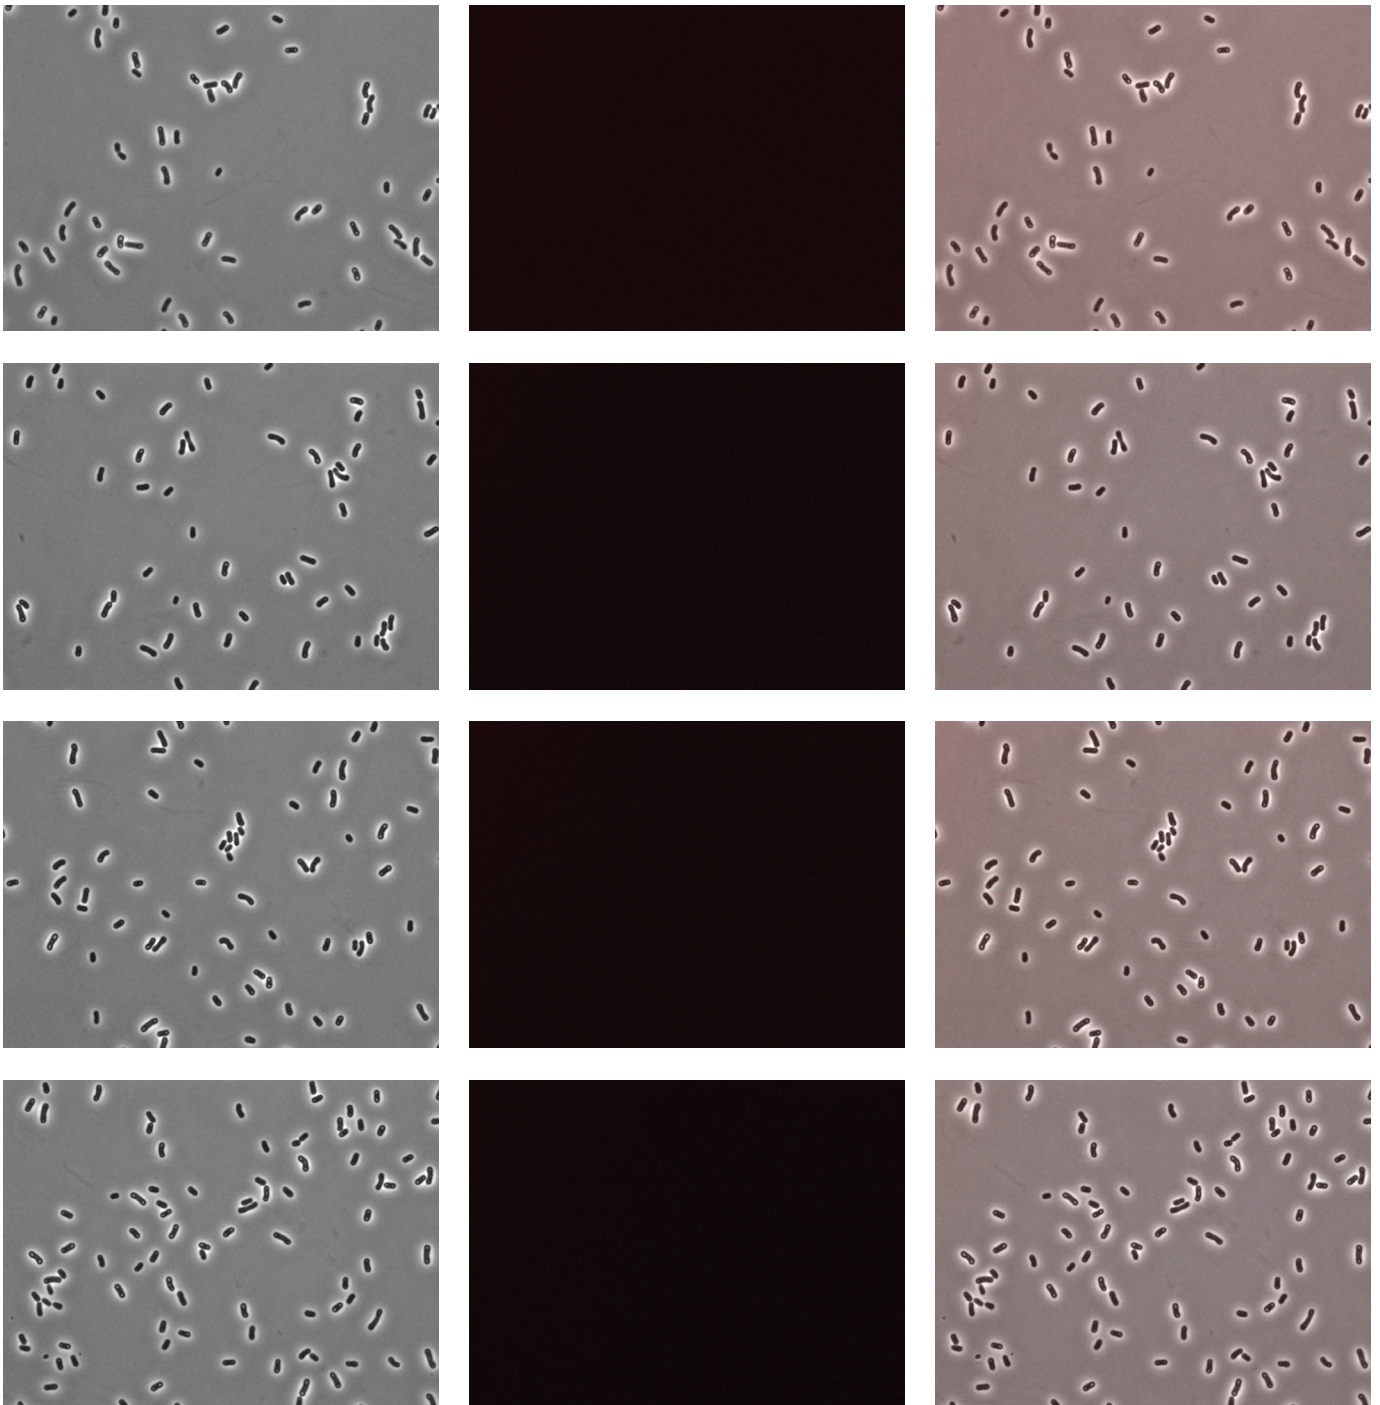

— 10 μm

Fig. S3: Random field of views of *M. extorquens* PA1 cells grown on minimal medium agar plates in the dark.
